# Supplementary material for: A bioinspired peptide scaffold with high antibiotic activity and low in vivo toxicity
Source: PubMed Central journal article supplement (PMC4603705; doi:10.1038/srep10558), 2015-05-29
Supplement: srep10558-s1.pdf [file srep10558-s1.pdf]

## Supplementary Information

### **A bioinspired peptide scaffold with high antibiotic activity and low *in vivo* toxicity**

Francesc Rabanal, Ariadna Grau-Campistany, Xavier Vila-Farrés, Javier Gonzalez-Linares, Miquel Borràs, Jordi Vila, M<sup>a</sup> Angels Manresa, Yolanda Cajal

<sup>1</sup>Department of Organic Chemistry, Faculty of Chemistry, University of Barcelona;

<sup>2</sup>Department of Physical Chemistry, Faculty of Pharmacy, University of Barcelona;

<sup>3</sup>Department of Microbiology, Faculty of Pharmacy, University of Barcelona;

<sup>4</sup>Barcelona Centre for International Health Research (CRESIB) Hospital Clínic – University of Barcelona;

<sup>5</sup>Experimental Toxicology and Ecotoxicology Unit /CERETOX, Barcelona Science Park.

**Supplementary Table S1:** MIC of additional lipopeptide analogs. Amino acids substituted with respect to the parent sequence (**1**) are marked in red. D-amino acids are denoted in italics (*Phe* or *Cys*). Antimicrobial activities (MIC,  $\mu\text{g/mL}$ ) for Gram-negative (*P. aeruginosa* and *E. coli*, P. a. and E. c., respectively) and *S. aureus* (S. a.) are listed. Cysteine residues form a disulfide bond (underlined) except when specified as linear. C9 means nonanoyl moiety.

| N° | Peptide sequence                                                                           | S. a. | P. a. | E. c. |
|----|--------------------------------------------------------------------------------------------|-------|-------|-------|
| 7  | C9-Arg-Thr-Arg-Cys-Dab-Phe-Leu-Dab-Dab-Cys                                                 | 32    | 32    | 32    |
| 9  | C9-Arg-Thr-Dab-Cys-Arg-Phe-Leu-Arg-Dab-Cys                                                 | 16    | 128   | 16    |
| 11 | C9-Arg-Thr-Arg-Cys-Arg-Phe-Leu-Arg-Dab-Cys                                                 | 16    | 128   | 16    |
| 14 | C9-Dap[(C=NH)NH <sub>2</sub> ]-Thr-Dab-Cys-Dab-Phe-Leu-Dap[(C=NH)NH <sub>2</sub> ]-Dab-Cys | 16    | 16    | 2     |
| 15 | C9-Dab[(C=NH)NH <sub>2</sub> ]-Thr-Dab-Cys-Dab-Phe-Leu-Dab[(C=NH)NH <sub>2</sub> ]-Dab-Cys | >32   | 8     | 4     |
| 16 | C9-Arg(NO <sub>2</sub> )-Thr-Dab-Cys-Dab-Phe-Leu-Arg(NO <sub>2</sub> )-Dab-Cys             | >32   | 16-32 | 4-8   |
| 17 | C9-Arg-Thr-Dab-Cys-Dab-Phe-Leu-Arg-Dab-Cys Linear                                          | 32    | 16    | 64    |
| 18 | C9-Arg-Thr-Dab-Ser-Dab-Phe-Leu-Arg-Dab-Ser Linear                                          | 64    | 64    | 32    |
| 19 | C9-Dab-Thr-Dab-Cys-Dab-Phe-Met-Dab-Dab-Cys                                                 | 32    | 16    | 4     |
| 20 | C9-Dab-Thr-Dab-Cys-Dab-Phe-Met(O)-Dab-Dab-Cys                                              | >32   | 8-16  | >32   |
| 21 | C9-Arg-Thr-Dab-Cys-Dab-Phe-Met-Arg-Dab-Cys                                                 | >32   | 8     | 8-16  |
| 22 | C9-Arg-Thr-Arg-Cys-Dab-Phe-Met-Arg-Dab-Cys                                                 | 32    | 16    | 16    |
| 23 | C9-Arg-Thr-Dab-Cys-Dab-Phe-Leu-Arg-Dab-Cys                                                 | 32    | 128   | 64    |
| 24 | C9-Arg-Thr-Dab-Cys-Dab-Gly-Gly-Arg-Dab-Cys                                                 | >128  | >128  | >128  |
| 25 | C9-Arg-Thr-Dab-Cys-Dab-Gly-Leu-Arg-Dab-Cys                                                 | >128  | >128  | >128  |
| 26 | C9-Arg-Thr-Dab-Cys-Dab-Phe-Gly-Arg-Dab-Cys                                                 | 128   | >128  | 64    |
| 27 | C9-Arg-Thr-Dab-Cys-Dab-Phe-Thr-Arg-Dab-Cys                                                 | 64    | 8     | 16    |
| 28 | C9-Arg-Thr-Dab-Cys-Dab-Trp-Leu-Arg-Dab-Cys                                                 | 8     | 8     | 4     |
| 29 | C9-Arg-Thr-Dab-Cys-Dab-Leu-Leu-Arg-Dab-Cys                                                 | 32    | 16    | 32    |
| 30 | C9-Arg-Thr-Dab-Cys-Dab-Leu-Thr-Arg-Dab-Cys                                                 | >128  | 32    | 32    |
| 31 | C9-Arg-Thr-His-Cys-Dab-Phe-Leu-Arg-His-Cys                                                 | 128   | 32    | 32    |
| 32 | C9-Arg-Thr-Lys-Cys-Dab-Phe-Leu-Arg-Lys-Cys                                                 | 32    | 16    | 8     |
| 33 | C9-Lys-Thr-Dab-Cys-Dab-Phe-Leu-Lys-Dab-Cys                                                 | 128   | 32    | 16    |
| 34 | C9-Arg-Thr-Orn-Cys-Dab-Phe-Leu-Arg-Orn-Cys                                                 | 32    | 16    | 8     |
| 35 | C9-Orn-Thr-Dab-Cys-Dab-Phe-Leu-Orn-Dab-Cys                                                 | 64    | 16    | 16    |

**Supplementary Table S2:** Statistical parameters of cell viability studies reported in Table 2. IC50 and confidence intervals are expressed in  $\mu\text{g/mL}$ .

|             |      |                         | <b>Analog 5<br/>(2 Arg)</b> | <b>Analog 8<br/>(3 Arg)</b> | <b>Analog 12<br/>(5 Arg)</b> |
|-------------|------|-------------------------|-----------------------------|-----------------------------|------------------------------|
| <b>hDF</b>  | Exp1 | IC50                    | 555.2                       | 420.8                       | 147.0                        |
|             |      | 95% confidence int. –   | 497.6 –                     | 398.8 –                     | 141.6 –                      |
|             |      | Goodness of Fit – $R^2$ | 0.9958                      | 0.9948                      | 0.9973                       |
|             | Exp2 | IC50                    | 512.6                       | 502.1                       | 181.2                        |
|             |      | 95% confidence int. –   | 461.0 –                     | 440.7 –                     | 168.6 –                      |
|             |      | Goodness of Fit – $R^2$ | 0.9913                      | 0.9895                      | 0.9922                       |
| <b>MDCK</b> | Exp1 | IC50                    | 540.9                       | 416.8                       | 232.6                        |
|             |      | 95% confidence int. –   | 495.4 –                     | 394.6 –                     | 223.2 –                      |
|             |      | Goodness of Fit – $R^2$ | 0.9905                      | 0.9943                      | 0.9964                       |
|             | Exp2 | IC50                    | 554.3                       | 527.7                       | 146.9                        |
|             |      | 95% confidence int. –   | 496.8 –                     | 476.9 –                     | 137.9 –                      |
|             |      | Goodness of Fit – $R^2$ | 0.9905                      | 0.9943                      | 0.9964                       |
| <b>PC12</b> | Exp1 | IC50                    | 597.3                       | 640.1                       | 244.8                        |
|             |      | 95% confidence int. –   | 531.6 –                     | 542.4 –                     | 234.4 –                      |
|             |      | Goodness of Fit – $R^2$ | 0.9955                      | 0.9932                      | 0.9966                       |
|             | Exp2 | IC50                    | 660.3                       | 550.2                       | 205.9                        |
|             |      | 95% confidence int. –   | 620.9 –                     | 514.8 –                     | 196.9 –                      |
|             |      | Goodness of Fit – $R^2$ | 0.9957                      | 0.9956                      | 0.9959                       |

**Supplementary Table S3:** Flow cytometry analysis and reduction of viability (obtained by plate count) of *E. coli* treated with polymyxin B.

|        |                       |                       | <i>E. coli</i>     |     |                       |
|--------|-----------------------|-----------------------|--------------------|-----|-----------------------|
|        |                       |                       | % of stained cells |     | % viability reduction |
| Sample | Concentration (µg/mL) | Incubation time (min) | PI                 | BOX |                       |
| PxB    | 0.5                   | 5                     | 11                 | 45  | 0                     |
|        | 0.5                   | 10                    | 20                 | 35  | 20                    |
|        | 0.5                   | 15                    | 60                 | 17  | 34                    |
|        | 0.5                   | 30                    | 68                 | 13  | 65                    |
|        | 0.5                   | 60                    | 57                 | 23  | 87                    |
|        | 0.5                   | 120                   | 71                 | 17  | 98                    |

**Supplementary Figure S4:** Flow cytometry analysis of *E. coli* and *S. aureus* showing the effect of PxB and analog 38 on the membrane permeability (PI) and membrane potential (BOX). a,b, untreated control cells of *E. coli* and *S. aureus* respectively. c,d, *E. coli* cells after exposure to PxB and PxBN respectively. e,f, *E. coli* and *S. aureus* cells after exposure to analog 38. g,h, *E. coli* and *S. aureus* control of heated cells (70 °C). In all cases, the incubation time was 2 hours except for heated cells (30 min).

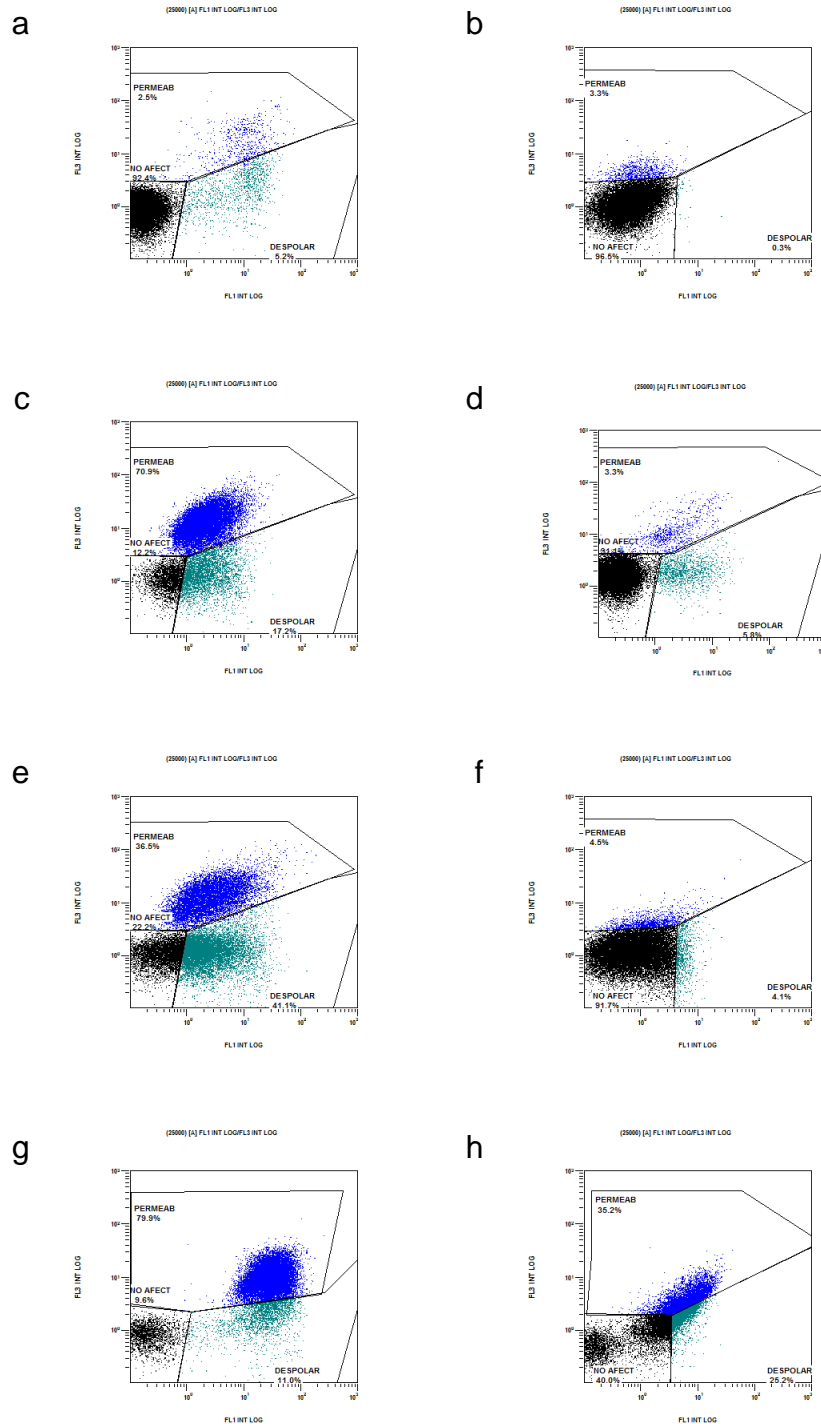

**Supplementary Figure S5:** Characterization by HPLC and MS of analogs **38** (upper) and **39** (lower). Elution conditions of 5% to 95% B in 30 min, solvent A: 0.045% TFA in H<sub>2</sub>O and B: 0.036% TFA in acetonitrile (column: Nucleosil-C18, 120Å, 250x4.6 mm).

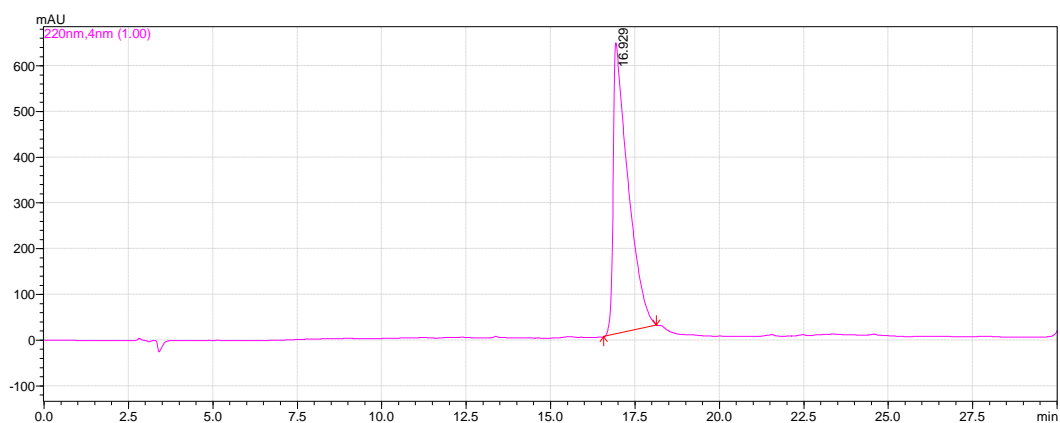

MALDI-TOF MS  $m/z$  ( $C_{55}H_{96}N_{16}O_{12}S_2$ ): 1237.9 [M+H]<sup>+</sup>, 1259.7[M+Na]<sup>+</sup>, 1275.7 [M+K]<sup>+</sup>, 1219.9 [M-H<sub>2</sub>O]<sup>+</sup>

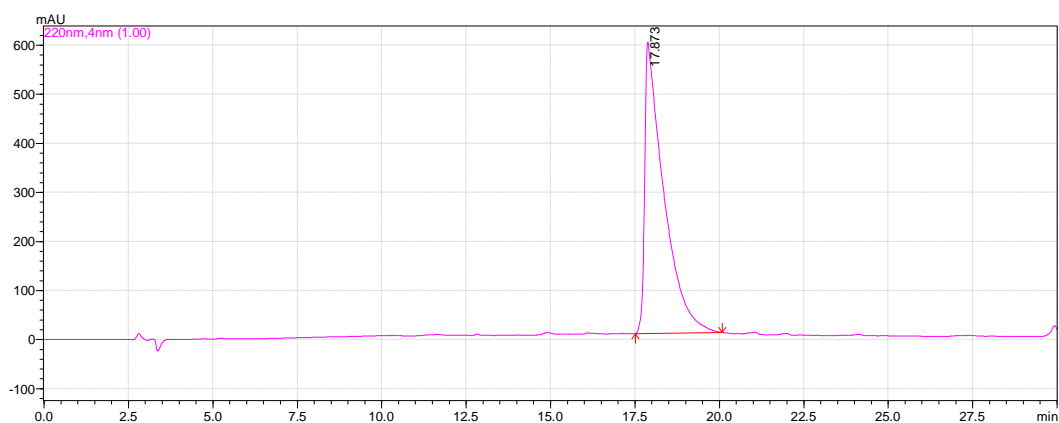

MALDI-TOF MS  $m/z$  ( $C_{57}H_{100}N_{16}O_{12}S_2$ ): 1265.9 [M+H]<sup>+</sup>, 1287.8 [M+Na]<sup>+</sup>, 1303.7 [M+K]<sup>+</sup>, 1247.8 [M-H<sub>2</sub>O]<sup>+</sup>
